# Supplementary material
Source: ML conference proceedings conference paper supplement (https://openreview.net/forum?id=c8m4Yzx8hm)

Entropy of Top 50 Images Across all Visual Topics

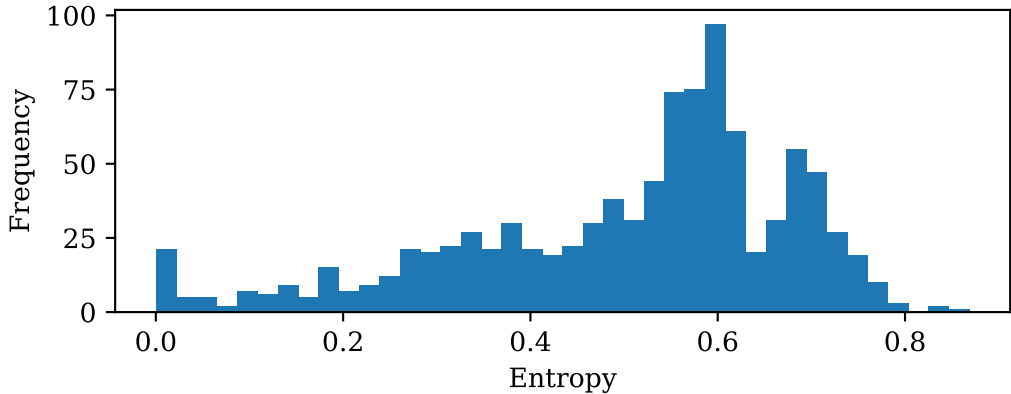

Supplement: supplementary_material [file attachment]

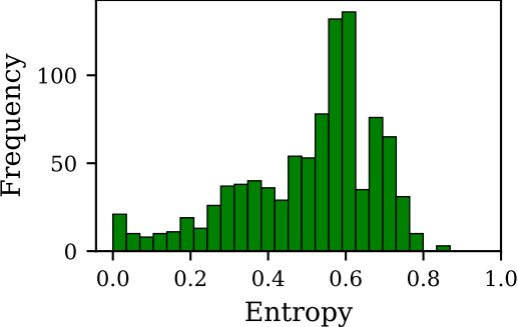

Supplement: supplementary_material [file attachment]
